# Supplementary material for: Measurement-Based Care Versus Standard Care for Major Depression: A Randomized Controlled Trial With Blind Raters
Source: Atypon-hosted journal article supplement (doi:10.1176/appi.ajp.2015.14050652), 2015-08-28
Supplement: appi.ajp.2015.14050652.ds001.pdf [file appi.ajp.2015.14050652.ds001.pdf]

**FIGURE S1. Flow Chart of Patient Disposition**

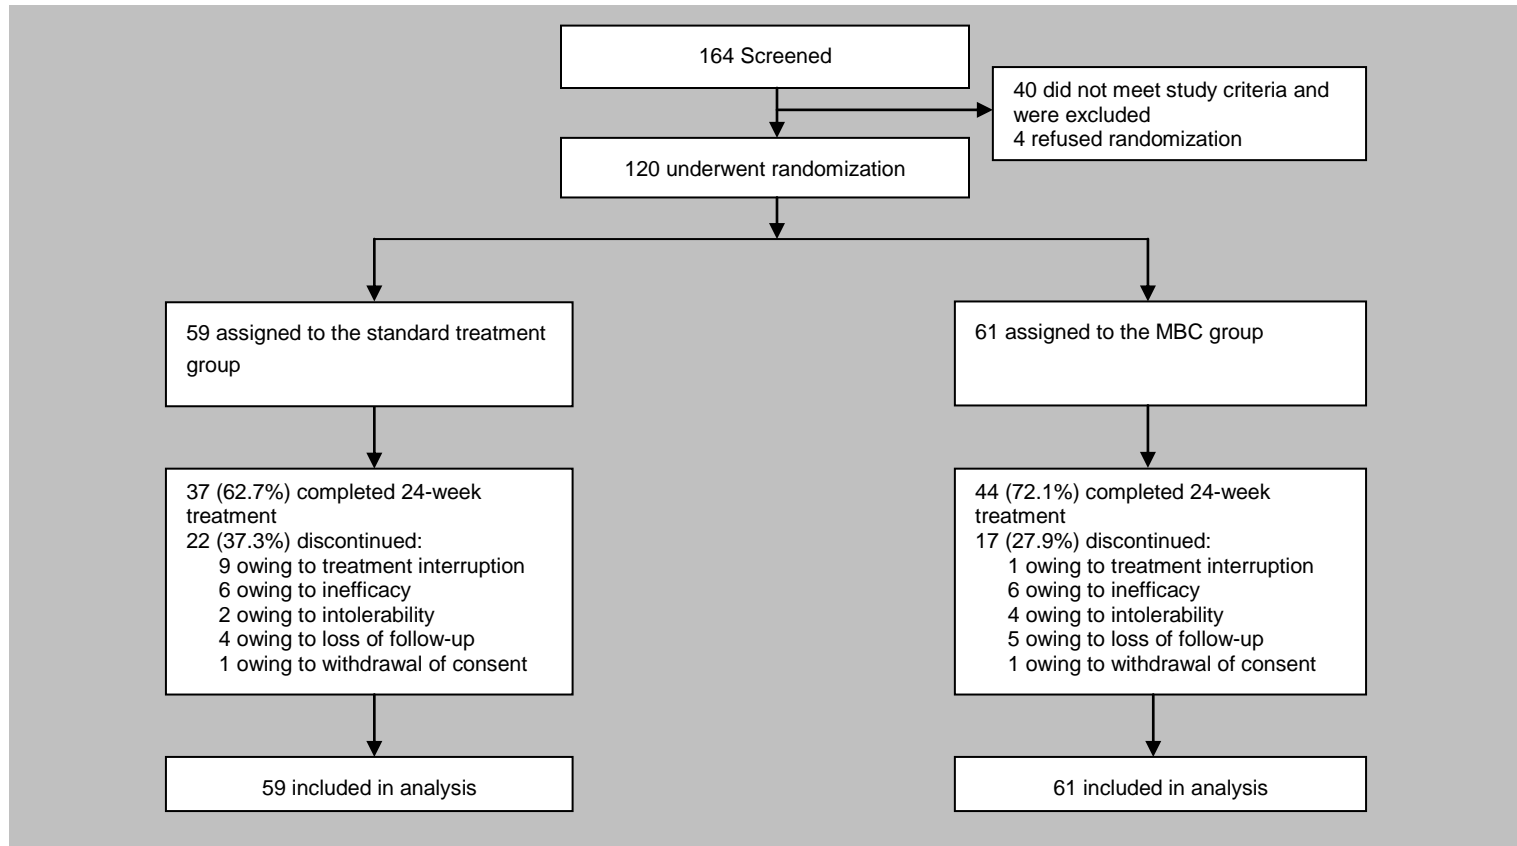

MBC=measurement-based care. Treatment interruption refers to any period of 5 or more consecutive days during which the medication was discontinued for any reason.
